# Supplementary material for: Facile controlled synthesis of core–shell/yolk–shell/hollow ZIF-67@Co-LDH/SiO2via a self-template method
Source: Royal Society of Chemistry journal article supplement (doi:10.1039/c9qi01684h), 2020-01-01
Supplement: c9qi01684h1.pdf [file c9qi01684h1.pdf]

## Electronic Supporting Information (ESI)

### Facile controlled synthesis of core-shell/yolk-shell/hollow ZIF-67@Co-LDH/SiO<sub>2</sub> via a self-templated method

Duoyu Lin,<sup>a</sup> Pan Duan,<sup>a</sup> Yanfeng Liu,<sup>a</sup> Weiting Yang<sup>\*a</sup> and Qinhe Pan<sup>\*a</sup>

#### CONTENTS

| Section |                                                                                                                                                                                                                                         | Page No |
|---------|-----------------------------------------------------------------------------------------------------------------------------------------------------------------------------------------------------------------------------------------|---------|
| 1       | <b>Fig. S1</b> XRD patterns of ZIF-67@Co-LDH/SiO <sub>2</sub> -4h, Non-NaOH and Non-CTAB.                                                                                                                                               | 1       |
| 2       | <b>Fig. S2</b> TEM images of ZIF-67@Co-LDH/SiO <sub>2</sub> -13h.                                                                                                                                                                       | 2       |
| 3       | <b>Fig. S3</b> Pore size distribution curves for ZIF-67@Co-LDH/SiO <sub>2</sub> -1.5h, ZIF-67@Co-LDH/SiO <sub>2</sub> -6h, ZIF-67@Co-LDH/SiO <sub>2</sub> -10h, and ZIF-67@Co-LDH/SiO <sub>2</sub> -13h, respectively.                  | 3       |
| 4       | <b>Table. S1</b> Co <sup>2+</sup> content of ZIF-67@Co-LDH/SiO <sub>2</sub> -1.5h, ZIF-67@Co-LDH/SiO <sub>2</sub> -4h, ZIF-67@Co-LDH/SiO <sub>2</sub> -6h, ZIF-67@Co-LDH/SiO <sub>2</sub> -10h and ZIF-67@Co-LDH/SiO <sub>2</sub> -13h. | 4       |
| 5       | <b>Table S2</b> Constants for pseudo-first- and pseudo-second-order model kinetics of ZIF-67@Co-LDH/SiO <sub>2</sub> -1.5h, ZIF-67@Co-LDH/SiO <sub>2</sub> -6h and ZIF-67@Co-LDH/SiO <sub>2</sub> -10h.                                 | 4       |
| 6       | <b>Table S3</b> Adsorption isotherm parameters of Langmuir and Freundlich models for Congo red on ZIF-67@Co-LDH/SiO <sub>2</sub> -1.5h, ZIF-67@Co-LDH/SiO <sub>2</sub> -6h and ZIF-67@Co-LDH/SiO <sub>2</sub> -10h.                     | 4       |

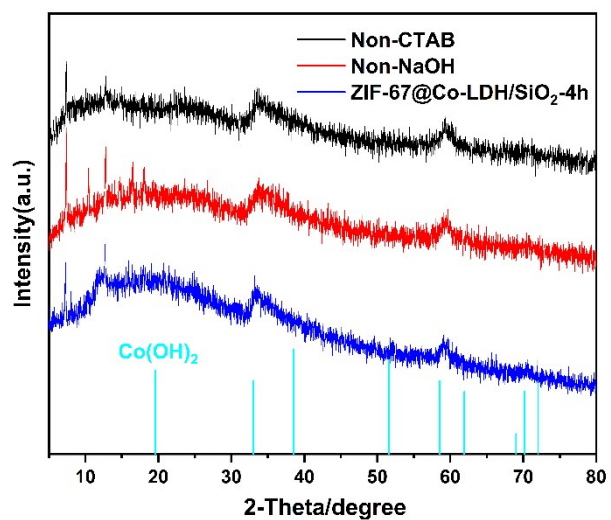

**Fig. S1** XRD patterns of ZIF-67@Co-LDH/SiO<sub>2</sub>-4h, Non-NaOH and Non-CTAB at a reaction time of 4h.

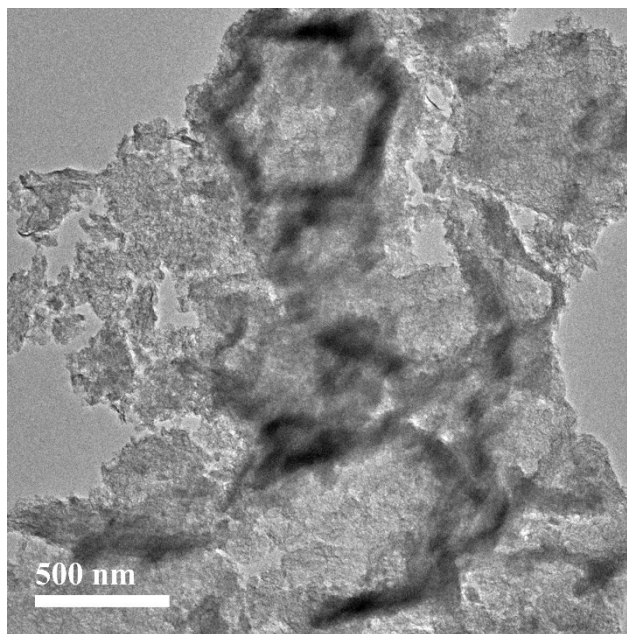

**Fig. S2** TEM images of ZIF-67@Co-LDH/SiO<sub>2</sub>-13h.

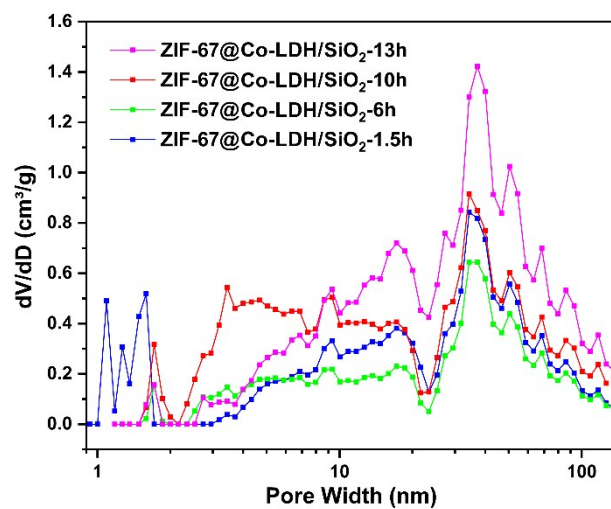

**Fig. S3** Pore size distribution curves for ZIF-67@Co-LDH/SiO<sub>2</sub>-1.5h, ZIF-67@Co-LDH/SiO<sub>2</sub>-6h, ZIF-67@Co-LDH/SiO<sub>2</sub>-10h, and ZIF-67@Co-LDH/SiO<sub>2</sub>-13h, respectively.

**Table S1** Co<sup>2+</sup> content of ZIF-67@Co-LDH/SiO<sub>2</sub>-1.5h, ZIF-67@Co-LDH/SiO<sub>2</sub>-4h, ZIF-67@Co-LDH/SiO<sub>2</sub>-6h, ZIF-67@Co-LDH/SiO<sub>2</sub>-10h and ZIF-67@Co-LDH/SiO<sub>2</sub>-13h.

|   | Samples                              | Co <sup>2+</sup> content (%) |
|---|--------------------------------------|------------------------------|
| 1 | ZIF-67@Co-LDH/SiO <sub>2</sub> -1.5h | 22.67                        |
| 2 | ZIF-67@Co-LDH/SiO <sub>2</sub> -4h   | 24.69                        |
| 3 | ZIF-67@Co-LDH/SiO <sub>2</sub> -6h   | 25.85                        |
| 4 | ZIF-67@Co-LDH/SiO <sub>2</sub> -10h  | 30.14                        |
| 5 | ZIF-67@Co-LDH/SiO <sub>2</sub> -13h  | 30.32                        |

**Table S2** Constants for pseudo-first- and pseudo-second-order model kinetics of ZIF-67@Co-LDH/SiO<sub>2</sub>-1.5h, ZIF-67@Co-LDH/SiO<sub>2</sub>-6h and ZIF-67@Co-LDH/SiO<sub>2</sub>-10h.

| Samples                              | Pseudo-first-order model |                |                | Pseudo-second-order model |                |                       |
|--------------------------------------|--------------------------|----------------|----------------|---------------------------|----------------|-----------------------|
|                                      | R <sup>2</sup>           | q <sub>e</sub> | K <sub>1</sub> | R <sup>2</sup>            | q <sub>e</sub> | K <sub>2</sub>        |
| ZIF-67@Co-LDH/SiO <sub>2</sub> -1.5h | 0.90635                  | 1064.832       | 0.02446        | 0.99035                   | 984.34155      | 4.42×10 <sup>-5</sup> |
| ZIF-67@Co-LDH/SiO <sub>2</sub> -6h   | 0.91321                  | 1104.192       | 0.02377        | 0.99055                   | 1032.34124     | 4.16×10 <sup>-5</sup> |
| ZIF-67@Co-LDH/SiO <sub>2</sub> -10h  | 0.92887                  | 1112.832       | 0.05502        | 0.99003                   | 1116.24956     | 9.25×10 <sup>-5</sup> |

**Table S3** Adsorption isotherm parameters of Langmuir and Freundlich models for Congo red on ZIF-67@Co-LDH/SiO<sub>2</sub>-1.5h, ZIF-67@Co-LDH/SiO<sub>2</sub>-6h and ZIF-67@Co-LDH/SiO<sub>2</sub>-10h.

| Samples                              | Langmuir adsorption |                |                | Freundlich adsorption |         |                |
|--------------------------------------|---------------------|----------------|----------------|-----------------------|---------|----------------|
|                                      | q <sub>max</sub>    | K <sub>L</sub> | R <sup>2</sup> | K <sub>F</sub>        | n       | R <sup>2</sup> |
| ZIF-67@Co-LDH/SiO <sub>2</sub> -1.5h | 1294.843            | 0.78062        | 0.99264        | 1289.73097            | 2.89759 | 0.90923        |
| ZIF-67@Co-LDH/SiO <sub>2</sub> -6h   | 1085.422            | 0.90409        | 0.99737        | 1080.74158            | 1.92002 | 0.91922        |
| ZIF-67@Co-LDH/SiO <sub>2</sub> -10h  | 1919.484            | 1.45736        | 0.99869        | 1139.04384            | 0.06291 | 0.90836        |
